# Supplementary material for: Prophylactic Total Gastrectomy: a Prospective Cohort Study of Long-Term Impact on Quality of Life
Source: Springer Nature journal article supplement (doi:10.1007/s11605-016-3287-8), 2016-10-17
Supplement: MOESM1 [file 10898778]

Prophylactic total gastrectomy: a prospective cohort study of long-term impact on quality of life.

Jennifer Muir, Melyssa Aronson, Mary-Jane Esplen, Aaron Pollett, Carol J. Swallow

Corresponding author: Dr. Carol J. Swallow ([cswallow@mtsinai.on.ca](mailto:cswallow@mtsinai.on.ca))

**Supplemental Table 1: Detailed results of the EORTC QLQ-C30 and STO22 questionnaires.**

| **Subscale** | **Declined Surgery (T0, n=5)** | **1 mo. pre-operative**  **(T1, n=6)** | **1 mo. post-operative**  **(T2, n=8)** | **6 mo. post-operative**  **(T3, n=6)** | **12 mo. post-operative**  **(T4, n=7)** | **24 mo. post-operative**  **(T5, n=8)** |
| --- | --- | --- | --- | --- | --- | --- |
| **EORTC QLQ-C30** | | | | | | |
| **Functional Subcales** | | | | | | |
| Physical | 40, 100 (87-100)& | 17, 100 (93-100) | 75, 80 (60-100) | 83, 93 (67-100) | 14, 100 (93-100) | 75, 93 (67-100) |
| Role | 20, 100 (83-100) | 0, 100* | 75, 67 (33-100) | 50, 92 (50-100) | 0, 100* | 50, 92 (67-100) |
| Emotional | 60, 83 (50-100) | 67, 88 (75-100) | 63, 88 (58-100) | 100, 79 (33-92) | 71, 92 (75-100) | 100, 83 (42-92) |
| Cognitive | 20, 100 (83-100) | 17, 100 (83-100) | 25, 100 (83-100) | 33, 100 (33-100) | 14, 100 (83-100) | 63, 83 (67-100) |
| Social | 0, 100* | 17, 100 (67-100) | 50, 83 (50-100) | 67, 75 (17-100) | 0, 100* | 63, 67 (67-100) |
| **Symptom Subcales** | | | | | | |
| Fatigue | 60, 11 (0-44) | 33, 0 (0-11) | 88, 33 (0-78) | 100, 28 (11-78) | 43, 0 (0-22) | 88, 33 (0-56) |
| Nausea and vomiting | 20, 0 (0-16) | 17, 0 (0-17) | 50, 17 (0-50) | 83, 25 (0-67) | 43, 0 (0-17) | 63, 17 (0-33) |
| Pain | 20, 0 (0-16) | 17, 0 (0-17) | 75, 17 (0-33) | 33, 0 (0-17) | 14, 0 (0-17) | 50, 17 (0-33) |
| **Single Items** | | | | | | |
| Dyspnea | 20, 0 (0-33) | 0, 0* | 63, 33 (0-67) | 17, 0 (0-67) | 0, 0* | 38, 0 (0-33) |
| Insomnia | 60, 33 (0-66) | 0, 0* | 75, 33 (0-67) | 50, 17 (0-33) | 14, 0 (0-33) | 88, 33 (0-67) |
| Appetite loss | 0, 0* | 0, 0* | 63, 33 (0-67) | 50, 17 (0-100) | 14, 0 (0-33) | 63, 33 (0-67) |
| Constipation | 20, 0 (0-33) | 0, 0* | 25, 0 (0-33) | 0, 0* | 0, 0* | 13, 0 (0-33) |
| Diarrhea | 20, 0 (0-33) | 17, 0 (0-33) | 50, 17 (0-67) | 50, 17 (0-100) | 43, 0 (0-33) | 38, 0 (0-33) |
| Financial difficulties | 0, 0* | 17, 0 (0-33) | 0, 0* | 0, 0* | 0, 0* | 13, 0 (0-33) |
| **EORTC STO22** | | | | | | |
| Dysphagia | 0, 0* | 0, 0* | 50, 6 (0-44) | 100, 22 (11-56) | 57, 11 (0-22) | 63, 11 (0-22) |
| Stomach/eating discomfort | 40, 0 (0-25) | 17, 0 (0-17) | 88, 29 (0-58) | 83, 33 (0-42) | 100, 17 (8-33) | 88, 21 (0-42) |
| Reflux | 0, 0* | 33, 0 (0-11) | 75, 22 (0-33) | 83, 11 (0-56) | 57, 11 (0-55) | 63, 11 (0-44) |
| Eating restrictions | 0, 0* | 0, 0* | 100, 21 (8-83) | 100, 42 (25-67) | 86, 8 (0-33) | 88, 25 (0-42) |
| Anxiety about health | 100, 22 (11-56) | 100, 22 (11-44) | 88, 28 (0-56) | 100, 28 (11-89) | 86, 33 (0-55) | 100, 39 (11-67) |
| Dry mouth | 0, 0* | 0, 0* | 50, 17 (0-67) | 50, 17 (0-67) | 43, 0 (0-33) | 50, 17 (0-100) |
| Taste changes | 0, 0* | 0, 0* | 38, 0 (0-100) | 50, 17 (0-100) | 29, 0 (0-33) | 13, 0 (0-33) |
| Body image | 20, 0 (0-33) | 0, 0* | 25, 0 (0-67) | 33, 0 (0-100) | 14, 0 (0-33) | 25, 0 (0-66) |
| Hair loss | 0, 0* | 0, 0* | 0, 0* | 50, 17 (0-67) | 29, 0 (0-67) | 38, 0 (0-33) |

&The first number in a cell represents the percent of patients reporting a deficit or a symptom; the second number is the median subscale score on a scale of 0 to 100. The range of scores is given in brackets.

*No range is expressed because all patients had the same score
